# Supplementary material
Source: HighWire-hosted journal article supplement (doi:10.1101/rna.078747.121)
Supplement: Supplemental_Table_S1_.xlsx [file Supplemental_Table_S1_.xlsx]

## Sheet: Sheet1
List of Bacillus subtilis strains (with described genotype) and growth medium with matched Rend-seq/ribosome profiling from Lalanne et al, 2021 [GEO/GSE162169] analyzed in the current work.
Strain	Genotype	Description	Growth medium	Comment
GLB115	Bacillus subtilis subsp. 168	Wild-type	LB	sigB inactive condition in figures
GLB452	lacA::PspankHy-RF1-PrmC-YwkF camR, amyE::Pxyl-RF2 (no frameshift) specR, prfB::∅, prfA::∅	Orthogonally inducible RF1 and RF2 (endogenous copies deleted)	MCC, 1% glycerol, 10 uM IPTG, 0% xylose
GLB452	lacA::PspankHy-RF1-PrmC-YwkF camR, amyE::Pxyl-RF2 (no frameshift) specR, prfB::∅, prfA::∅	Orthogonally inducible RF1 and RF2 (endogenous copies deleted)	MCC, 1% glycerol, 500 uM IPTG, 0.5% xylose
GLB452	lacA::PspankHy-RF1-PrmC-YwkF camR, amyE::Pxyl-RF2 (no frameshift) specR, prfB::∅, prfA::∅	Orthogonally inducible RF1 and RF2 (endogenous copies deleted)	MCC, 1% glycerol, 10 uM IPTG, 0.5% xylose
GLB452	lacA::PspankHy-RF1-PrmC-YwkF camR, amyE::Pxyl-RF2 (no frameshift) specR, prfB::∅, prfA::∅	Orthogonally inducible RF1 and RF2 (endogenous copies deleted)	MCC, 1% glycerol, 25 uM IPTG, 0.015% xylose
GLB452	lacA::PspankHy-RF1-PrmC-YwkF camR, amyE::Pxyl-RF2 (no frameshift) specR, prfB::∅, prfA::∅	Orthogonally inducible RF1 and RF2 (endogenous copies deleted)	MCC, 1% glycerol, 500 uM IPTG, 0% xylose
GLB372	3610 ylbF::mls	Deletion of YlbF (member of the Y-complex, see DeLoughery et al, PNAS, 2018).	LB
CAG74829	lacA::Pxyl-dcas9(ErmR), amyE::Pveg-sgRNA_prfA(CmR)	CRISPRi with sgRNA targeting prfA (gene for RF1)	LB, 0.04% w/v xylose
CAG74815	lacA::Pxyl-dcas9(ErmR), amyE::Pveg-sgRNA_prfB(CmR)	CRISPRi with sgRNA targeting prfB (gene for RF2)	LB, 0.05% w/v xylose	sigB active condition in figures
GLB115	Bacillus subtilis subsp. 168	Wild-type	MCC, 1% glycerol
GLB115	Bacillus subtilis subsp. 168	Wild-type	MCC, 1% glycerol, 500 uM IPTG, 0.5% xylose
GLB455	amyE::Pxyl-GFP_RFP(SpcR), lacA::PspankHy-RFP_GFP(CmR)	Ectopic expression of fluorescent proteins	MCC, 1% glycerol, 0.2% xylose, 100 uM IPTG
GLB455	amyE::Pxyl-GFP_RFP(SpcR), lacA::PspankHy-RFP_GFP(CmR)	Ectopic expression of fluorescent proteins	MCC, 1% glycerol, 0.5% xylose, 1 mM IPTG
