# Supplementary material
Source: HighWire-hosted journal article supplement (doi:10.1101/rna.078747.121)
Supplement: Supplemental_Table_S2.xlsx [file Supplemental_Table_S2.xlsx]

## Sheet: list_bacillus
Species from the Bacillus genus within the RefSeq set of representative and reference bacterial genomes with an identified homolog of the rsbV-rsbW-sigB operon considered for the evolutionary conservation analysis of secondary structure in the intergenic region of operons with dual transcription-translation activation in Bacillus subtilis. The GTDB taxonomy is taken from the r86 version (Parks et…
RefSeq assembly accession	GTDB taxonomy
GCF_000008165.1	d__Bacteria;p__Firmicutes;c__Bacilli;o__Bacillales;f__Bacillaceae;g__Bacillus;s__Bacillus anthracis
GCF_000008505.1	d__Bacteria;p__Firmicutes;c__Bacilli;o__Bacillales;f__Bacillaceae;g__Bacillus;s__Bacillus thuringiensis
GCF_000011645.1	d__Bacteria;p__Firmicutes;c__Bacilli;o__Bacillales;f__Bacillaceae;g__Bacillus;s__Bacillus licheniformis
GCF_000177235.2	d__Bacteria;p__Firmicutes;c__Bacilli;o__Bacillales;f__Bacillaceae;g__Bacillus;s__Bacillus cellulosilyticus
GCF_000196735.1	d__Bacteria;p__Firmicutes;c__Bacilli;o__Bacillales;f__Bacillaceae;g__Bacillus;s__Bacillus amyloliquefaciens
GCF_000473245.1	d__Bacteria;p__Firmicutes;c__Bacilli;o__Bacillales;f__Bacillaceae;g__Bacillus;s__Bacillus infantis
GCF_000007825.1	d__Bacteria;p__Firmicutes;c__Bacilli;o__Bacillales;f__Bacillaceae;g__Bacillus;s__Bacillus cereus
GCF_000009045.1	d__Bacteria;p__Firmicutes;c__Bacilli;o__Bacillales;f__Bacillaceae;g__Bacillus;s__Bacillus subtilis
GCF_001050115.1	d__Bacteria;p__Firmicutes;c__Bacilli;o__Bacillales;f__Bacillaceae;g__Bacillus;s__Bacillus smithii
GCF_000724485.1	d__Bacteria;p__Firmicutes;c__Bacilli;o__Bacillales;f__Bacillaceae;g__Bacillus;s__Bacillus methanolicus
GCF_000005825.2	d__Bacteria;p__Firmicutes;c__Bacilli;o__Bacillales;f__Bacillaceae;g__Bacillus;s__Bacillus pseudofirmus
GCF_001578185.1	d__Bacteria;p__Firmicutes;c__Bacilli;o__Bacillales;f__Bacillaceae;g__Bacillus;s__Bacillus simplex
GCF_001578205.1	d__Bacteria;p__Firmicutes;c__Bacilli;o__Bacillales;f__Bacillaceae;g__Bacillus;s__Bacillus pumilus
GCF_001889165.1	d__Bacteria;p__Firmicutes;c__Bacilli;o__Bacillales;f__Bacillaceae;g__Bacillus;s__Bacillus weihaiensis
GCF_002109385.1	d__Bacteria;p__Firmicutes;c__Bacilli;o__Bacillales;f__Bacillaceae;g__Bacillus;s__Bacillus krulwichiae
GCF_002173495.1	d__Bacteria;p__Firmicutes;c__Bacilli;o__Bacillales;f__Bacillaceae;g__Bacillus;s__Bacillus atrophaeus
GCF_002157855.1	d__Bacteria;p__Firmicutes;c__Bacilli;o__Bacillales;f__Bacillaceae;g__Bacillus;s__Bacillus horikoshii
GCF_000009825.1	d__Bacteria;p__Firmicutes;c__Bacilli;o__Bacillales;f__Bacillaceae;g__Bacillus;s__Bacillus clausii
GCF_000832985.1	d__Bacteria;p__Firmicutes;c__Bacilli;o__Bacillales;f__Bacillaceae;g__Bacillus;s__Bacillus megaterium
GCF_000007845.1	d__Bacteria;p__Firmicutes;c__Bacilli;o__Bacillales;f__Bacillaceae;g__Bacillus;s__Bacillus anthracis
GCF_000832605.1	d__Bacteria;p__Firmicutes;c__Bacilli;o__Bacillales;f__Bacillaceae;g__Bacillus;s__Bacillus mycoides
GCF_000497525.1	d__Bacteria;p__Firmicutes;c__Bacilli;o__Bacillales;f__Bacillaceae;g__Bacillus;s__Bacillus thuringiensis
GCF_000294775.2	d__Bacteria;p__Firmicutes;c__Bacilli;o__Bacillales;f__Bacillaceae;g__Bacillus;s__Bacillus oceanisediminis
GCF_001721685.1	d__Bacteria;p__Firmicutes;c__Bacilli;o__Bacillales;f__Bacillaceae;g__Bacillus;s__Bacillus beveridgei
GCF_900093775.1	d__Bacteria;p__Firmicutes;c__Bacilli;o__Bacillales;f__Bacillaceae;g__Bacillus;s__Bacillus glycinifermentans
GCF_002024265.1	d__Bacteria;p__Firmicutes;c__Bacilli;o__Bacillales;f__Bacillaceae;g__Bacillus;s__Bacillus flexus

## Sheet: operon_conservation
List of pairs of genes considered for the analysis of conserved operon structure. The RefSeq id for the protein sequences queried to the other Bacillus species are listed. Column E lists the number of species in which the operon was conserved. Column F the number of instances with conserved operon in which a clear RNA secondary structure sequestered the Shine-Dalgarno sequence in the long upstrea…
upstream gene (sigA isoform)	Refseq upstream protein	downstream gene (sigB-dependent)	Refseq downstream protein	Number of Bacillus species with conserved operon (excluding Bacillus subtilis)	Fraction of conserved of Bacillus species with conserved operon displaying with secondary structure in putative long sigA isoform absent in short sigB isoform
yrbE	NP_390655.1	csbX	NP_390654.2	none	N/A
prs	NP_387932.1﻿	ctc	NP_387933.1﻿	18 out of 25	13 out of 18 (4/5 with weak structure have an intervening terminators)
dctB	NP_388325.1﻿	ydbD	NP_388324.1	1 out of 25	1 out of 1
yflG	NP_388650.1	yflH	NP_388649.1	2 out of 25	2 out of 2
citA	NP_388825.2	yhdF	NP_388826.1﻿	2 out of 25	2 out of 2
yocL	NP_389806.1	yocK	NP_389805.2	1 out of 25	1 out of 1
yvrG	NP_391201.2	yvrE	NP_391200.1	2 out of 25	2 out of 2
glxK	NP_391884.2	yxaB	NP_391883.3	1 out of 25	1 out of 1
