# Supplementary material
Source: HighWire-hosted journal article supplement (doi:10.1101/rna.078747.121)
Supplement: Supplemental_Table_S3.xlsx [file Supplemental_Table_S3.xlsx]

## Sheet: sigB_induced_genes_low_TE_isofo
Table of induced sigB dependent genes (>3.7-fold increase in mRNA and/or ribosome profiling signal), stratified by changes in apparent TE. For genes with no large change in TE, Rend-seq data was parsed to assess whether a gene was predominantly present as a simple mRNA isoform (see Methods for details).
		sigB inactive			sigB active
	gene	rpkm_mRNA_1	rpkm_Ribo_1	TE_1	rpkm_mRNA_2	rpkm_Ribo_2	TE_2	ratio_mRNA	ratio_Ribo	ratio_TE	Simple isoform
No large change in TE (subset with simple isoform cyan in Fig. 1B-D)	csbC	8.9201	10.3846	1.16418	371.724	402.128	1.08179	41.6726	38.7235	0.929233	1
	cypC	2.5116	1.5102	0.60129	45.7314	59.4036	1.29897	18.2081	39.3349	2.1603	0
	dps	187.549	354.809	1.89183	1458.57	3379.9	2.31727	7.77703	9.52596	1.22488	0
	gspA	23.2719	15.3059	0.657699	677.528	522.132	0.770642	29.1136	34.1131	1.17173	1
	katE	5.0266	6.1727	1.22801	122.223	207.611	1.69863	24.3152	33.6337	1.38324	1
	katX	2.9671	4.7331	1.59519	42.8818	71.1924	1.6602	14.4524	15.0414	1.04075	1
	mgsR	33.5641	110.697	3.29808	844.042	4867.67	5.7671	25.1472	43.9729	1.74862	1
	ohrB	11.0989	19.7216	1.7769	312.137	701.846	2.24852	28.1233	35.5877	1.26542	1
	opuE	14.8623	8.7928	0.591618	253.385	143.455	0.566156	17.0488	16.3151	0.956962	0
	rsbRD	17.1772	20.2203	1.17716	259.139	359.532	1.38741	15.0862	17.7808	1.17861	0
	rsbV	210.95	367.317	1.74125	1393.46	3870.3	2.77748	6.60562	10.5367	1.59511	0
	rsbW	167.326	274.349	1.63961	1268.55	867.932	0.684194	7.58128	3.1636	0.417291	0
	rsbX	95.4224	40.6336	0.425829	807.903	204.288	0.252862	8.46659	5.02755	0.593811	0
	ycbP	11.4942	12.5625	1.09294	363.15	438.743	1.20816	31.5942	34.9248	1.10542	1
	ycdF	3.6063	8.3841	2.32485	74.0173	297.078	4.01363	20.5244	35.4335	1.7264	1
	ycdG	5.7188	1.4909	0.260702	79.3283	24.3135	0.306492	13.8715	16.3079	1.17564	0
	ydaG	20.3234	24.5241	1.20669	447.763	814.741	1.81958	22.0319	33.2221	1.50791	0
	ydaP	8.4923	5.4112	0.637189	116.357	162.583	1.39728	13.7015	30.0457	2.19287	0
	ydhK	12.9382	15.5466	1.2016	100.118	82.5308	0.824334	7.73818	5.30861	0.686028	0
	yerD	1.6134	1.4764	0.915086	25.2749	34.1481	1.35107	15.6656	23.1293	1.47644	1
	yfhF	4.8803	2.4166	0.495174	33.3158	20.4943	0.615153	6.82659	8.48063	1.24229	1
	yfhM	15.9685	11.4209	0.715214	64.6009	32.1507	0.497682	4.04552	2.81508	0.69585	0
	yfkH	23.3292	1.7594	0.0754162	209.851	28.4948	0.135786	8.9952	16.1957	1.80049	0
	yfkI	20.2942	26.6208	1.31174	171.747	177.298	1.03232	8.46285	6.66013	0.786985	0
	yfkM	10.1302	24.3153	2.40028	221.291	565.761	2.55664	21.8447	23.2677	1.06514	1
	yflA	2.1709	1.0671	0.491547	46.2729	35.6724	0.770913	21.3151	33.4293	1.56834	0
	yhdN	8.2324	9.7987	1.19026	242.371	332.841	1.37327	29.4412	33.9679	1.15375	1
	yjgC	2.1331	1.3401	0.628241	57.6356	51.5449	0.894324	27.0196	38.4635	1.42354	0
	ykuT	29.8445	20.2725	0.679271	144.304	105.157	0.728723	4.83519	5.1872	1.0728	0
	ypuD	12.1394	13.7258	1.13068	56.4241	58.5535	1.03774	4.64801	4.26594	0.917799	1
	ytxG	125.286	92.7365	0.740198	604.947	392.49	0.648801	4.82853	4.23232	0.876523	0
	ytxH	140.254	196.237	1.39915	600.439	910.575	1.51652	4.28108	4.64019	1.08388	0
	ytxJ	195.163	182.513	0.935182	845.025	889.967	1.05318	4.32984	4.87618	1.12618	0
	ywiE	10.3947	3.0699	0.295333	223.979	73.2139	0.326879	21.5474	23.849	1.10681	1
	ywjB	102	38.9549	0.381911	398.298	101.273	0.254265	3.90488	2.59976	0.665771	0
	ywjC	49.591	90.5514	1.82596	1344.03	2100.85	1.5631	27.1024	23.2007	0.856038	1
	ywtG	3.8103	2.8957	0.759966	127.985	114.378	0.893682	33.5893	39.4993	1.17595	1
	ywzA	19.7082	44.1229	2.23881	682.144	2224.25	3.26068	34.6122	50.4103	1.45643	1
	yxkO	6.1791	4.1619	0.673545	20.1428	21.674	1.07602	3.25983	5.20772	1.59754	0
	yxnA	3.3169	1.2708	0.383129	37.941	36.9846	0.974792	11.4387	29.1034	2.54429	0
Large increase in TE (red in Fig. 1B-D, 1E)	ctc	963.205	180.005	0.186881	2163.91	3115.61	1.4398	2.24658	17.3084	7.70436	0
	yhdF	16.0313	2.036	0.127002	53.7706	70.7952	1.31662	3.3541	34.7717	10.3669	0
	yjbC	148.116	35.3877	0.238919	402.858	288.949	0.717248	2.71989	8.16525	3.00205	0
	yjzE	27.8983	8.7213	0.31261	210.857	190.731	0.90455	7.55807	21.8695	2.89354	0
	aldY	1.7539	0.7826	0.446206	26.7779	42.5045	1.5873	15.2676	54.3119	3.55732	0
	ydbD	22.9967	1.2563	0.0546296	95.2185	71.5833	0.751779	4.14053	56.9795	13.7614	0
	yflH	103.383	5.9345	0.057403	199.923	133.871	0.669611	1.93381	22.5581	11.6651	0
	ygxB	2.5103	0.7061	0.281281	114.797	100.051	0.871544	45.7305	141.695	3.09848	0
	yocK	9.1515	5.3681	0.586581	86.0655	166.995	1.94033	9.40452	31.1088	3.30785	0
	csbX	58.1796	3.6616	0.0629361	118.914	55.264	0.46474	2.04391	15.0929	7.38431	0
	yvrE	72.4173	8.4184	0.116248	215.811	200.07	0.927059	2.98011	23.7658	7.97481	0
	yxaB	16.1467	4.0319	0.249704	71.459	175.259	2.45259	4.42561	43.4682	9.82197	0
Large decrease in TE (yellow in Fig. 1B-D)	csbA	108.516	52.6554	0.485234	414.62	40.0762	0.0966577	3.82084	0.761103	0.199198	0
	yfkJ	20.4432	23.3305	1.14124	199.929	29.4364	0.147235	9.77971	1.26171	0.129013	0
	ywjA	68.8416	52.7194	0.765807	272.616	63.3733	0.232464	3.96004	1.20209	0.303554	0
	sigB	142.562	65.3459	0.45837	1107.58	176.044	0.158946	7.76911	2.69404	0.346763	0	Not considered because large overlap with upstream ORF
